# Supplementary material
Source: MDPI journal article supplement (https://www.mdpi.com/2073-4352/13/1/132)
Supplement: s1 [file s1 › crystals-2002100-supplementary.pdf]

## **Supporting Information**

# **Synergistic Occlusion of Doxorubicin and Hydrogels in CaCO<sub>3</sub> Composites for Controlled Drug Release**

**Ya-Xin Li, Yuan Jiang\***

College of Materials, Fujian Key Laboratory of Advanced Materials, Higher Educational Key Laboratory for Biomedical Engineering of Fujian Province, Xiamen University, Xiamen 361005, P.R. China

\*Correspondence: yuan.jiang@xmu.edu.cn

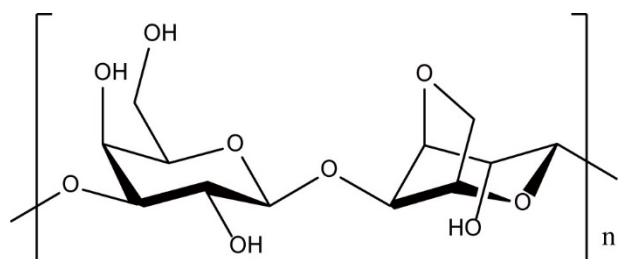

**Figure S1.** Molecular formula of agarose.

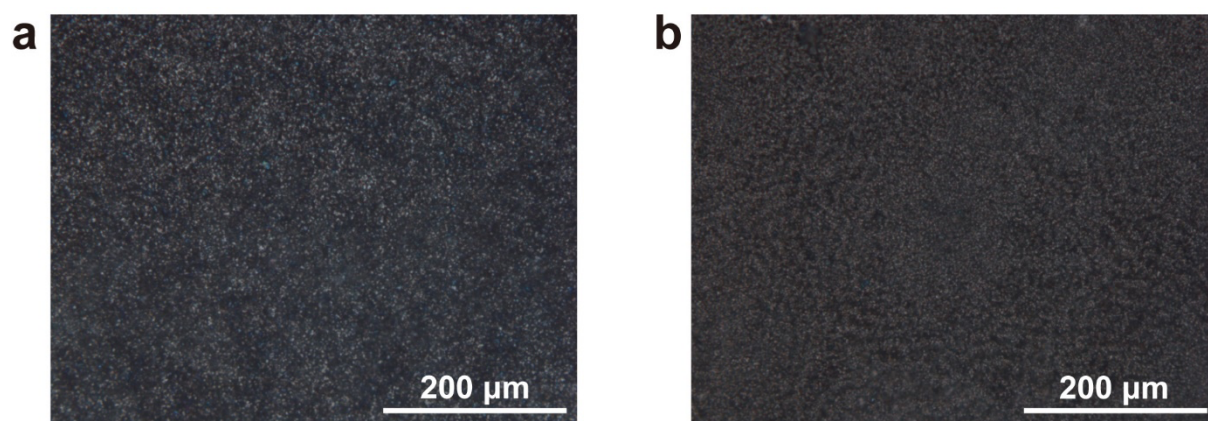

**Figure S2.** POM images showing DOX-CaCO<sub>3</sub>-alginate (**a**) and CaCO<sub>3</sub>-alginate (**b**) films obtained in 2 wt% alginate hydrogels.

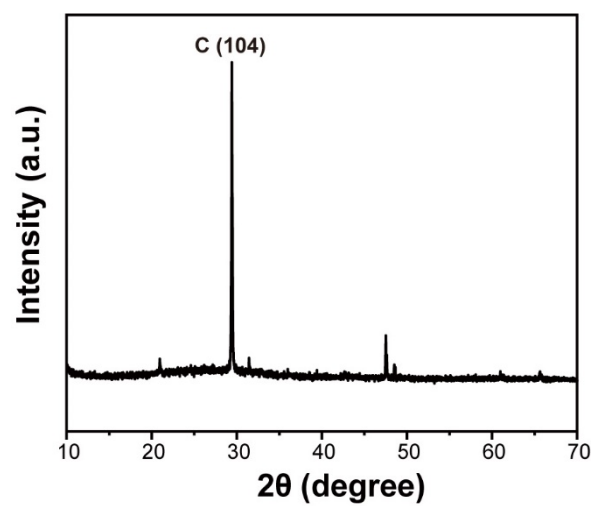

**Figure S3.** XRD patten of the DOX-CaCO<sub>3</sub>-alginate composites.

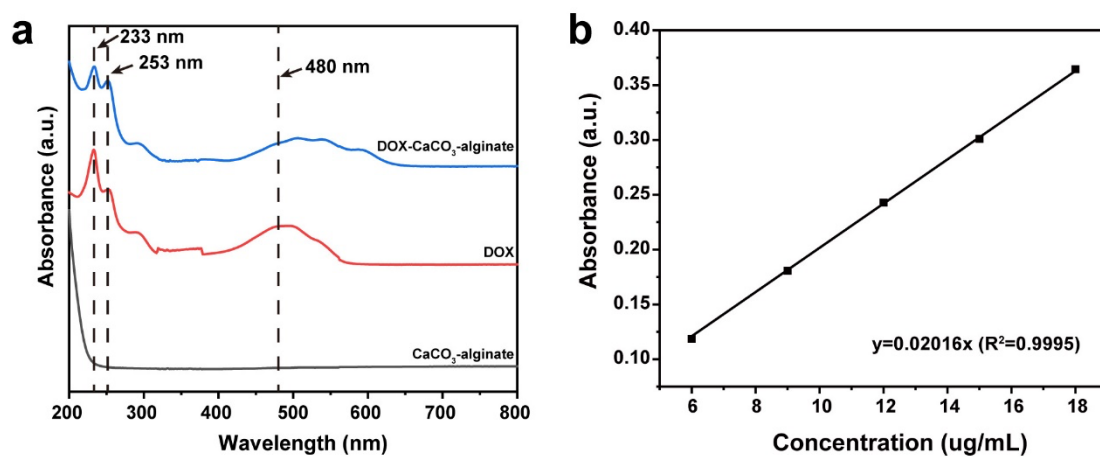

**Figure S4.** (a) UV-vis spectra of the DOX-CaCO<sub>3</sub>-alginate composites, the CaCO<sub>3</sub>-alginate composites, and DOX, respectively. (b) The standard UV-vis absorbance curve of DOX at 480 nm.
